# Supplementary material for: A Jacob/Nsmf Gene Knockout Results in Hippocampal Dysplasia and Impaired BDNF Signaling in Dendritogenesis
Source: PubMed Central journal article supplement (PMC4792503; doi:10.1371/journal.pgen.1005907), 2016-03-15
Supplement: pgen.1005907.s002.pdf [file pgen.1005907.s002.pdf]

**S1 Table. Results of different behavioral parameters during the exposition of *Jacob/Nsmf* ko and wt mice to TMT or DEP.** Data are presented as mean  $\pm$  SEM, data analysis of individual mice from both genotypes was performed using multivariate analyses of variance (MANOVA's) with GENOTYPE and ODOR as the between-subject factors.

| <i>Parameter</i> | <i>GENOTYPE x ODOUR</i> | <i>GENOTYPE</i>       | <i>ODOUR</i>                      | <i>Up in</i> |
|------------------|-------------------------|-----------------------|-----------------------------------|--------------|
| Freezing [sec]   | F(1,26)= 2.13, n.s.     | F(1,26)= 2.59, n.s.   | F(1,26)= 150.10, p<0.001          | TMT          |
| Sniffing [n]     | F(1,26)= 0.08, n.s.     | F(1,26)= 1.26, n.s.   | F(1,26)= 1.68, p<0.001            | DEP          |
| Rearing [n]      | F(1,26)= 0.13, n.s.     | F(1,26)= 0.03, n.s.   | F(1,26)= 23.40, p<0.001           | DEP          |
| Leaning [n]      | F(1,26)= 0.27, n.s.     | F(1,26)= 0.53, n.s.   | F(1,26)= 14.58, p<0.01            | DEP          |
| Grooming [sec]   | F(1,26)= 1.81, n.s.     | F(1,26)= 3.92, n.s.   | F(1,26)= 15.02, p<0.01            | DEP          |
| Jumping [n]      | F(1,26)= 1.58, n.s.     | F(1,26)= 0.29, n.s.   | F(1,26)= 5.02, p<0.05             | TMT          |
| Rampage [sec]    | F(1,26)= 1.76, n.s.     | F(1,26)= 1.76, n.s.   | F(1,26)= 1.76, n.s.               | -            |
| Scratching [sec] | F(1,26)= 1.07, n.s.     | F(1,26)= 1.16, n.s.   | F(1,26)= 15.21, p<0.01            | DEP          |
| Activity [sec]   | F(1,26)= 0.14, n.s.     | F(1,26)= 1.76, n.s.   | F(1,26)= 21.25, <b>p&lt;0.001</b> | DEP          |
| Faeces [n]       | F(1,26)= 2.56, n.s.     | F(1,26)= 6.48, p<0.05 | F(1,26)= 0.18, n.s.               | -            |
