# Supplementary material for: A Jacob/Nsmf Gene Knockout Results in Hippocampal Dysplasia and Impaired BDNF Signaling in Dendritogenesis
Source: PubMed Central journal article supplement (PMC4792503; doi:10.1371/journal.pgen.1005907), 2016-03-15
Supplement: pgen.1005907.s003.pdf [file pgen.1005907.s003.pdf]

**S2 Table. Social interaction test with *Jacob/Nsmf* ko and wt mice.** Data are presented as mean  $\pm$  SEM, using unpaired t-tests (Welch's test); data collected from pairs of mice of each genotype were analyzed.

| <b>Parameter</b>                    | <b>-/- [n=8]</b>      | <b>+/+ [n=7]</b>     | <b>t-test (Welch-test)</b> |
|-------------------------------------|-----------------------|----------------------|----------------------------|
| Latency to first social contact [s] | 21.25 $\pm$ 5.11      | 22.86 $\pm$ 5.29     | T=-0.22, df=12.84, n.s.    |
| Number of contacts [n]              | 172.88 $\pm$<br>29.33 | 127.00 $\pm$<br>26.5 | T=1.16, df=12.99, n.s.     |
| Time spent in contact [s]           | 15.16 $\pm$ 2.75      | 9.33 $\pm$ 1.92      | T=1.74, df=12.13, n.s.     |
| Mean distance between animals [cm]  | 30.04 $\pm$ 1.89      | 34.03 $\pm$ 1.62     | T=-1.60, df=12.92, n.s.    |
| Active social interaction [%]       | 42.66 $\pm$ 3.83      | 35.83 $\pm$ 3.03     | T=1.40, df=12.70, n.s.     |
| Passive social interaction [%]      | 0.07 $\pm$ 0.07       | 0.00 $\pm$ 0.00      | T=1.00, df=7.00, n.s.      |
| Stay in the center area [%]         | 11.76 $\pm$ 1.72      | 12.46 $\pm$ 1.69     | T=-0.29, df=12.96, n.s.    |
| Stay in the edge area [%]           | 87.89 $\pm$ 1.73      | 87.24 $\pm$ 1.72     | T=0.27, df=12.93, n.s.     |
| Travelling distance [m]             | 63.23 $\pm$ 7.21      | 69.52 $\pm$<br>12.46 | T=-0.44, df=9.76, n.s.     |
| Aggressive behaviour [n]            | 6.13 $\pm$ 2.96       | 0.14 $\pm$ 0.14      | T=2.02, df=7.03, p<0.05    |
| Sniffing [n]                        | 37.00 $\pm$ 2.57      | 34.86 $\pm$ 2.33     | T=0.62, df=13.00, n.s.     |
| Anogenital Sniffing [n]             | 42.25 $\pm$ 4.64      | 31.14 $\pm$ 3.29     | T=1.95, df=12.21, p<0.05   |
| Following [n]                       | 17.63 $\pm$ 4.95      | 10.43 $\pm$ 2.51     | T=1.30, df=10.26, n.s.     |
| Defecation [n]                      | 1.63 $\pm$ 1.00       | 3.14 $\pm$ 0.77      | T=-1.20, df=12.60, n.s.    |
